# Supplementary material
Source: PubMed Central journal article supplement (PMC3126401)
Supplement: supp_77_9_3147__1.pdf [file supp_77_9_3147__1.pdf]

Table S1 Nucleotide sequence of Primers

| CYP       | Nucleotide Sequence of Primer (5'-3') |                                | Restriction Site |
|-----------|---------------------------------------|--------------------------------|------------------|
|           | Forward                               | Reverse                        |                  |
| CYP675A2  | CCGACTTGTTGAGACTTCGC                  | GGGCTCTAGATCAACGACGTCTGAACAT   | <i>Xba</i> I     |
| CYP620H3  | CCCCTCTACCAACGTTAGGC                  | GGGCTCTAGATTAACACTCCACCTTCTCG  | <i>Xba</i> I     |
| CYP682D2  | CCGTGCATCCTTCGGTAT                    | GGGCTCTAGACTATTTTATTAAGACCCGCA | <i>Xba</i> I     |
| CYP65AD1  | CCTTGCCCTGCCAACAACT                   | GGGCTCTAGACTATATTTTCCTAGGCAG   | <i>Xba</i> I     |
| CYP62C2   | CCGAGTGGCAGATATACTTGG                 | GGGCTCTAGATCAGTAGTTACACTCAACCT | <i>Xba</i> I     |
| CYP57B3   | CCATAGGGACGGTCTTGG                    | GGGCTCTAGACTAAGCCACATTTTCGACC  | <i>Xba</i> I     |
| CYP52G4   | CCTCCGATGCTCGTACAAC                   | GGGCTCTAGACTATAGCTCGGCCTGGTG   | <i>Xba</i> I     |
| CYP5076C1 | CCGATATCAAGGAAAAGCC                   | GGGCTCTAGACTATATAGCACGTTTTTGAA | <i>Xba</i> I     |
| CYP504B6  | CCGCCATAACAGCAACTCT                   | GGGACTAGTTCATATAACACGCTTCAAGGA | <i>Spe</i> I     |
| CYP5116A1 | CCTCGTTATTTCTTGTGATAGTG               | GGGCTCTAGATCAAACAGGTCCAG       | <i>Xba</i> I     |
| CYP65AC2  | CCACTTTGAGTGCAGAATCAT                 | GGGCTCTAGACTAGCGAACCACAGGC     | <i>Xba</i> I     |
| CYP65AB1  | CCCTGTTCTCCTTGGGAC                    | GGGCTCTAGATCAATGCCTTAATGGCTT   | <i>Xba</i> I     |
| CYP613C1  | CCGATTGCTTCTCTCTAGATGG                | CCCCCTCGAGTTAATCGTTTCTACGTTGA  | <i>Xba</i> I     |
| CYP660C2  | CCTCTGGTTCCACCACGA                    | GGGCTCTAGATTACCCAATTATCAGGCCA  | <i>Xba</i> I     |
| CYP58H1   | CCGATGAATTTACAATTTCCGC                | GGGCTCTAGATTAAGATTTACTTGCAATCC | <i>Xba</i> I     |

|           |                            |                                |                 |
|-----------|----------------------------|--------------------------------|-----------------|
| CYP5099A1 | CCGAGCATCACACTTGGGCA       | GGGCTCTAGATCAAGTGCACAGGTGG     | <i>Xba</i> I    |
| CYP5286A1 | CCGCCTCGCCTATGAAGT         | GGGCTCTAGACTAGATAGCGGGTCTGAA   | <i>Xba</i> I    |
| CYP655B1  | CCTTTACCCTAACAGAGTACTTCATC | GGGCTCTAGATTACGCAGTCTTTACAG    | <i>Xba</i> I    |
| CYP505A3  | CCAGCACGCCCAAGGCA          | GGACTAGTTTAAGCAAAAATATCCGTAGTA | <i>Spe</i> I    |
| CYP5061B5 | CCCCTGTGCTTGCTACCTT        | GGACTAGTCTAGTCAGTCGTTCCCT      | <i>Spe</i> I    |
| CYP51F2   | CCGCATCCTTCACTCTCGT        | GGACTAGTTCATGACTTTTCTGGGA      | <i>Spe</i> I    |
| CYP617D4  | CCATGGGACTTCCCTGG          | GGACTAGTTCACCACCCTTCTATATTA    | <i>Spe</i> I    |
| CYP61A6   | CCGACGCCAAGATGGCTA         | GGACTAGTCTAAGGCCGCCTCTTGAA     | <i>Spe</i> I    |
| CYP5068A2 | CCGAACTGATCATCGGCCTCT      | GGACTAGTTCAAATACGGTCTCGGAT     | <i>Spe</i> I    |
| CYP61A1   | CCGCCAACGTCACTGGGAG        | GGACTAGTTTAGGCACGAGGGCGGAA     | <i>Spe</i> I    |
| CYP59D2   | CCGGTGCTAACACCTTGGGA       | GGACTAGTTCAACGTAGAGTAACTTTACAA | <i>Spe</i> I    |
| CYP504A8  | CCTCGTTACAAACAATTGCGAT     | GGACTAGTCTACAGATCCTTCGTCCG     | <i>Spe</i> I    |
| CYP595B1  | CCTTCGGTCAAATCTTCTCCAGT    | GGACTAGTTCAAATACTAAATCCTCGGT   | <i>Spe</i> I    |
| CYP5111A1 | CCCTTCAGGATTTAATAGCCACTCT  | GGACTAGTTTAATGTAACATGAAGAT     | <i>Spe</i> I    |
| CYP5075B1 | CCTTGCTAATCATCGCAGTG       | GGACTAGTTCACTCAACCTGCTCCCA     | <i>Spe</i> I    |
| CYP578C2  | CCGCCGGATCGCCTATAGTGG      | CCCCAAGCTTTTACGCGGCTTCAAAT     | <i>Hind</i> III |
| CYP573A5  | CCGTTCTTGCAGGGGAGGA        | GGGCTCTAGATCATAGAGGCTTCACAG    | <i>Xba</i> I    |
| CYP58D2   | CCGGTGTGATTTCCGTTGTC       | GGGCTCTAGACTAGTCTTTGCGGATGC    | <i>Xba</i> I    |
| CYP65X1   | CCGCCCTTGCAGCTGAGTACTT     | GGGCTCTAGATCATGCAAATCTGTGAGT   | <i>Xba</i> I    |

|           |                               |                                 |                 |
|-----------|-------------------------------|---------------------------------|-----------------|
| CYP548F1  | CCATCTTACTCTTGTGTACTAGTCTTTTG | GGGCTCTAGACTATGGTACCTTAACATTTTC | <i>Xba</i> I    |
| CYP5070A1 | CCGCGCTTTTTACATTCCG           | GGGCTCTAGACTATCCATCAAGTTTACTG   | <i>Xba</i> I    |
| CYP5110A1 | CCGCAATCCAATCGACTCTG          | GGGCTCTAGATCACACTCCTAAGACG      | <i>Xba</i> I    |
| CYP577A4  | CCACTATCACACTCGTTGCAAT        | CCCCCAAGCTTTTAGGGGAAACATACTCG   | <i>Hind</i> III |
| CYP65AC1  | CCAGCCAATTTGCTCGCGAGA         | GGGCTCTAGATCAGCGTGC GACTGGA     | <i>Xba</i> I    |
| CYP59A4   | CCTACCTTTTCGCTCCTCATA         | GGGCTCTAGATCAACATCGTTCCTTGACA   | <i>Xba</i> I    |
| CYP60B3   | CCTATTTTCTCTCGCTACCAG         | GGGCTCTAGATTACTGTGGACTGCTGGAA   | <i>Xba</i> I    |
| CYP62A1   | CCACCAACACTGCGTCAAGAG         | GGGCTCTAGACTACAAC TGAATGGCGCA   | <i>Xba</i> I    |
| CYP584G1  | CCGCTGTTTCCCTGAGTTTTCTTAC     | GGGCTCTAGACTAAGCAGGCACCATCG     | <i>Xba</i> I    |
| CYP620G1  | CCATGTACACTTTAAGCACCTTGG      | GGGCTCTAGACTATACCCTCACTGACTC    | <i>Xba</i> I    |
| CYP65T4   | CCCCATTCAACATACTATTGTG        | GGGCTCTAGACTAGCCCC TAAAGCTCTC   | <i>Xba</i> I    |
| CYP58E2   | CCCTGGACACCATTT CAGAAAG       | GGGCTCTAGATTACAGGATCTTTTCCGT    | <i>Xba</i> I    |
| CYP540B10 | CCCCTATACGACAGTTCTATCTCC      | GGGCTCTAGATTAGTTCTCCGTCTTCGGTG  | <i>Xba</i> I    |
| CYP65AG1  | CCACAAC TTCGGTCTCGGCT         | GGGCTCTAGATCAATCAGTCTCCTGTGGTA  | <i>Xba</i> I    |
| CYP5119A1 | CCCTCCCTACCCTTCCCAATA         | GGACTAGTTCAGTAGCGCTCAAATGCTTTA  | <i>Spe</i> I    |
| CYP65AE1  | CCGAAGCCTTGCCAACCTAC          | GGGCTCTAGATCATT CACGGACTGGGA    | <i>Xba</i> I    |
| CYP5098A1 | CCGGTCTAATATTAGCATTTGCCGT     | GGGCTCTAGATTATGCGGAGGCCGTGTGGA  | <i>Xba</i> I    |
| CYP51F1   | CCGGCATCCTAGCTGTCATTC         | GGGCTCTAGACTACGCCTTGGTGACAG     | <i>Xba</i> I    |
| CYP620H1  | CCATGCTTGTAGTCAGCCTCCTC       | GGGCTCTAGATCAGATTTTCAGCTGAAGTT  | <i>Xba</i> I    |

|           |                              |                                |                |
|-----------|------------------------------|--------------------------------|----------------|
| CYP53A13  | CCATTGCCGAGCTCCTGACGCCCA     | GGGCTCTAGACTAAACAGCAACACTTCTC  | <i>XbaI</i>    |
| CYP630D1  | CCGCACTAGAAAAGTTATTTCATTGTGG | GGACTAGTCTATGCTTCGAGATCCCTCTCC | <i>SpeI</i>    |
| CYP620H9  | CCTCTTACATGGTTCTTGGGCT       | GGGCTCTAGACTACAGTACCGCAAT      | <i>XbaI</i>    |
| CYP5089A2 | CCGTCTCCAGTACGGCCTTT         | GGGCTCTAGATCACGCTAATTCTTCATACT | <i>XbaI</i>    |
| CYP5097A1 | CCGATCTTACTCTTCATCTCATCCT    | GGGCTCTAGACTAGAATCCTAGACTACTT  | <i>XbaI</i>    |
| CYP657B2  | CCGAAAAGGATGGATTATCTA        | GGGCTCTAGATCACACACGCGCTATTATAC | <i>XbaI</i>    |
| CYP620H2  | CCTTGGTCCCTAGTCAGCCTCGT      | GGGCTCTAGATCAGATCCTCAATTGTG    | <i>XbaI</i>    |
| CYP628C1  | CCGATACATTGTGGGTCTTG         | GGGCTCTAGATCACCTCTCACGGAATAC   | <i>XbaI</i>    |
| CYP541B3  | CCCCGTCGCCGATTCCGAAGCCGAAAGG | GGGCTCTAGATTAGGCAGCGCGAGCCC    | <i>XbaI</i>    |
| CYP653B1  | CCGATTACATGGATTATTTGAAAGAA   | GGGCTCTAGATCAGATATCAACGTTTTTC  | <i>XbaI</i>    |
| CYP55A5v2 | CCCAGTTAGAACCAGTGTATCCCAG    | GGACTAGTTCAATCTCTATCCCAAGTCAC  | <i>SpeI</i>    |
| CYP673C1  | CCACCCTTCTTCAGAATATC         | GGGCTCTAGATCAACGAACTCGAGCTCTAA | <i>XbaI</i>    |
| CYP535E1  | CCGGGTAGTCGAGCTGGTCTT        | CCCCAAGCTTCTAGAGACAGCTACCCA    | <i>HindIII</i> |
| CYP5109A1 | CCTCACCGTTCATCTTTGCTG        | GGGGCTCTAGATTATGACCAGGATCTTG   | <i>XbaI</i>    |
| CYP630B13 | CCTTATCTCTTGTCCTTGTTGC       | CCCCCTCGAGCTAGCCATCAAACCTGCG   | <i>XhoI</i>    |
| CYP660C1  | CCTCGGATATCCTCTCCATTATAG     | GGGGCTCTAGATTATCCAGTGATCAGAC   | <i>XbaI</i>    |
| CYP5093A2 | CCGATTATATCCACTCGCTCC        | GGACTAGTTCAAGAGTTGCCTTGCATTC   | <i>SpeI</i>    |
| CYP551A2  | CCGAAGATACCTTTAACTTGACC      | GGGCTCTAGATCACCGTATCAAACCCT    | <i>XbaI</i>    |
| CYP548D3  | CCCTCGTCCAGGAGGTTTG          | GGGCTCTAGACTAGACGGTTATATCCCTC  | <i>XbaI</i>    |

|           |                             |                                 |              |
|-----------|-----------------------------|---------------------------------|--------------|
| CYP58K1   | CCGTGATGGACCAGGC            | GGGCTCTAGATTACTCCCTCACGGCCTT    | <i>Xba</i> I |
| CYP5068B1 | CCGTTTCATATGAATGGTGTCTC     | GGGCTCTAGATTACGCAGACGAATCCTT    | <i>Xba</i> I |
| CYP5118A1 | CCTTCGTTCTTCCAACCAC         | GGGCTCTAGACTAAATGCGGGGTGTCAG    | <i>Xba</i> I |
| CYP540B9  | CCCCTATCAGACTCTTCTACCTTTC   | GGGCTCTAGATCAAAGTGAAGCTCTCGTA   | <i>Xba</i> I |
| CYP630A3  | CCCCTGGAATCTATGTTTTGG       | GGGCTCTAGATCATGCCTTTTCCCTTC     | <i>Xba</i> I |
| CYP620H4  | CCGCTTCCCTACATTTGGC         | CCCCCTCGAGCTATACCTTAATATTAACAA  | <i>Xho</i> I |
| CYP56C1   | CCGTCATGCACGGCCTCTGTA       | GGGCTCTAGATTACTTGCCTTCGGTGAAAA  | <i>Xba</i> I |
| CYP5042A2 | CCGGAGCATCAATCCAT           | GGGCTCTAGATCAAATTAGGCGCTTAGCAT  | <i>Xba</i> I |
| CYP58J1   | CCGATTCACCAAGACTCTGGA       | GGGCTCTAGATCAATCCTCATAAACCCCTCA | <i>Xba</i> I |
| CYP684A2  | CCGATTCGGGTTTATTTCGC        | GGGCTCTAGATCACACTTCCAGGAGGC     | <i>Xba</i> I |
| CYP5080B2 | CCTATATCCTACTCCTTCTCCCAGTTC | GGGCTCTAGACTACGCTTGTTTGGC       | <i>Xba</i> I |
| CYP5113A1 | CCACGGCCGAAACGGGATT         | GGGCTCTAGATTATGCATCCC GG CACA   | <i>Xba</i> I |
| CYP5107A1 | CCATTGGCGAGCAGTATAACC       | GGGCTCTAGATCATGTCATCCTCTTG      | <i>Xba</i> I |
| CYP51F4   | CCTCCTGGCCTCGGATTGG         | GGGCTCTAGATTATCCCGATTTTGCAG     | <i>Xba</i> I |
| CYP531E1  | CCTTATCTATCACCGAGCTGATAATG  | GGGCTCTAGATTAAACACTGACAGCCA     | <i>Xba</i> I |
| CYP5087B1 | CCTCACCTCGGGGCAAAATG        | GGGACTAGTTTAACTCAAACCTATGAGA    | <i>Spe</i> I |
| CYP58G1   | CCAATCTACCCTTGATTTGGA       | GGGCTCTAGATCACAGAGCATTAGTAAC    | <i>Xba</i> I |
| GYP58F1   | CCGCCTTGTTGGTGATATTAG       | GGGCTCTAGACTACTCGCTAATAACTCCC   | <i>Xba</i> I |
| CYP5106A1 | CCTCTTTTGCCTCAGCACTCAT      | GGGCTCTAGACTATCGCCCCACCCAT      | <i>Xba</i> I |

|           |                                         |                                |              |
|-----------|-----------------------------------------|--------------------------------|--------------|
| CYP548H1  | CCCAGGCAGTCGCGCTGCTGAGA                 | GGGCTCTAGACTACCGGAAAGAAACCTG   | <i>Xba</i> I |
| CYP567D2  | CCC GTTCATCCACACAGTTGACAGCGCTTTACTGGGTT | GGGCTCTAGATCAATGGTCTCTAGTGCAG  | <i>Xba</i> I |
| CYP654B1  | CCGACTTATTCCCAGAGACTAT                  | GGGCTCTAGACTATGTGCACCTTCTCC    | <i>Xba</i> I |
| CYP682B2  | CCACTCTAATATCGCTGTCTCTTCTT              | CCCCCTCGAGCTACTGCGCACTTAATCT   | <i>Xho</i> I |
| CYP52H3   | CCCTGGCCCAAATTGCTCC                     | GGGCTCTAGATTACTGGTTAAACCAGCA   | <i>Xba</i> I |
| CYP5117A1 | CCA ACTCAATTTCCGCCCTGT                  | GGGCTCTAGACTAACTCTTACAGGGTGC   | <i>Xba</i> I |
| CYP68Q1   | CCGACCATTTTAATCTGGCAGG                  | GGGCTCTAGATTATCGCTCAAACCAAGAAG | <i>Xba</i> I |
| CYP5094A1 | CCGCTTCCTTAACAGGTGCT                    | GGGCTCTAGATCAAGAACGAGTAAATGTC  | <i>Xba</i> I |
| CYP5053C1 | CCGTCACATTCTGGACAGGC                    | GGGCTCTAGATCATAGTTTCTCTGGATTGT | <i>Xba</i> I |
| CYP620K1  | CCGAGTCTATACTTCTATTTCTCACTATT           | GGGCTCTAGATCACACCAGCCTAAGCTC   | <i>Xba</i> I |
| CYP65AF1  | CCAATGTTCCGATAATCATGCTTTTCT             | GGGCTCTAGACTATATCCCAACCCTAGGTC | <i>Xba</i> I |
| CYP52G3   | CCATTCCCCTTCTCATTCTT                    | GGGCTCTAGACTAAGCCCCCTCCCTCAAC  | <i>Xba</i> I |
| CYP653C1  | CCGACAAATTGACCGCCAC                     | GGGCTCTAGACTACGCTGTACTCCGC     | <i>Xba</i> I |
| CYP630B12 | CCTGGTCCGCTCTATCTATCG                   | GGGCTCTAGATCATGCCTCCTGCACATTG  | <i>Xba</i> I |
| CYP631B2  | CCTTAATACTTCTCGGATTACTATGCC             | GGGCTCTAGATCAATGAGGAACGGCA     | <i>Xba</i> I |
| CYP531C3  | CCGATTCTTTTCTGTTTTTGG                   | GGGCTCTAGATCAGGAGCGACGGGAGAGTT | <i>Xba</i> I |
| CYP584E5  | CCGAACTCCTTCCAAAACCTCGTAA               | GGGCTCTAGATCAAGGAATAAGCCCAACT  | <i>Xba</i> I |
| CYP52K1   | CCCTAACCCTTTCTTTCTCTGCGT                | CCCCCTCGAGTTATCGACCTAGTGTCA    | <i>Xho</i> I |
| CYP68L2   | CCTTGGGCGATCTTTTC                       | CCCCCTCGAGTCACAGAACGGTTTCT     | <i>Xho</i> I |

|           |                              |                                |             |
|-----------|------------------------------|--------------------------------|-------------|
| CYP537B2  | CCTGGTCATTATGGTTATCTAGTATT   | GGACTAGTCTACGCAGTATCGACATCATC  | <i>SpeI</i> |
| CYP5095A1 | CCGGATTCACCCAGGATCT          | GGGCTCTAGACTAGTTAATCTTCACACG   | <i>XbaI</i> |
| CYP578B3  | CCACATCCGCTACCGCAAT          | GGGCTCTAGATCATGCCTCCTTTATAGGG  | <i>XbaI</i> |
| CYP630B11 | CCTACAGCTTACTTCTTATTGTCACCTC | GGGCTCTAGATTAATTATCTTCATATACCC | <i>XbaI</i> |
| CYP532A6  | CCACGCTTCTTGCGGAGGT          | GGGCTCTAGACTACTGTACCTCAATCTTCC | <i>XbaI</i> |
| CYP547C3  | CCGACTTGATGCTCGCCCT          | GGGCTCTAGATCACCAGTCATCCACC     | <i>XbaI</i> |
| CYP5078A5 | CCATTGACGCCGCGAGTGTT         | GGGCTCTAGATCACGAACGCACCCTTG    | <i>XbaI</i> |
| CYP5102A1 | CCGTTGTGTGTGTGATTACGGT       | GGGCTCTAGATCACTGGGAATTGGTCCTT  | <i>XbaI</i> |
| CYP5101A1 | CCTTGGATGACCTAGTGAGCA        | GGGCTCTAGACTACACGTTACGGCGA     | <i>XbaI</i> |
| CYP5075A1 | CCCTTCTACTGCTGCTCGAAACT      | GGGCTCTAGATTAGACCCGCCGACATTT   | <i>XbaI</i> |
| CYP5100A1 | CCCCTGCAATCAGTCTTTCTTT       | GGGCTCTAGACTAGCAGATAAAAAGGAT   | <i>XbaI</i> |
