# Supplementary material
Source: PubMed Central journal article supplement (PMC3126401)
Supplement: supp_77_9_3147__4.pdf [file supp_77_9_3147__4.pdf]

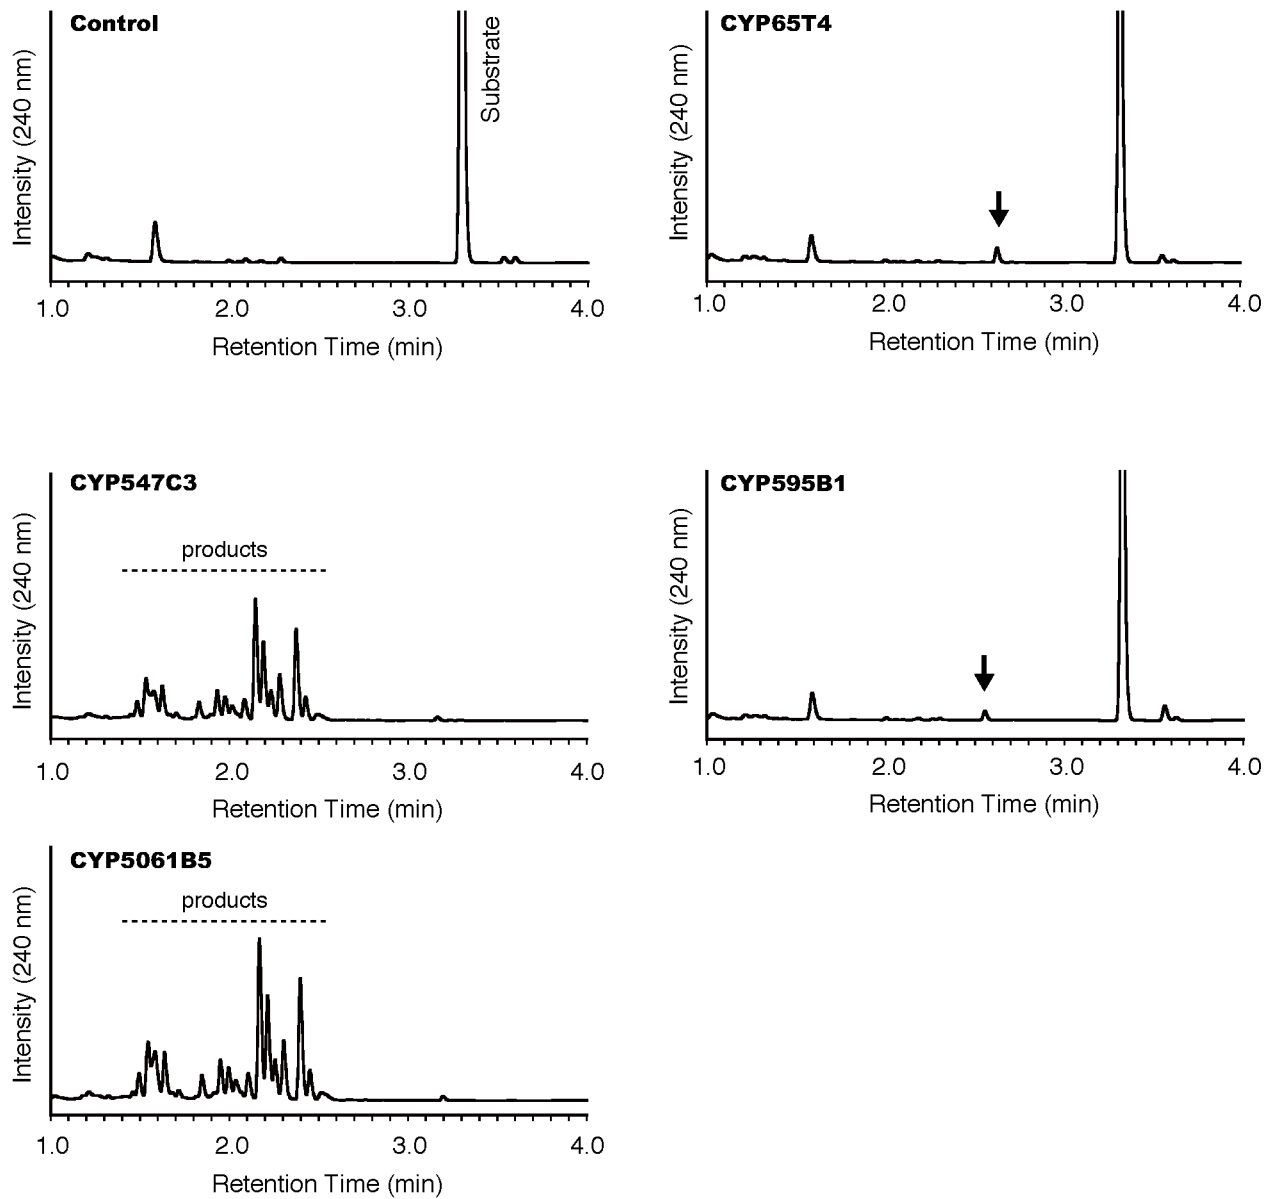

**Figure S3 HPLC analysis of testosterone conversion**

Chromatographic conditions were the same as those for genistein.

The mobile phase gradient was as follows: 0–0.2 min, 10% B; 0.2–3.2 min, 10–50% B; 3.2–3.6 min, 50–100% B; 3.6–4.0 min, 100% B. The flow rate was 1.4 mL/min. Arrow (in CYP65T4 and CYP595B1) indicates a product. Products (in CYP547C3 and CYP5061B5) are highlighted with broke lines.
