# Supplementary material
Source: PubMed Central journal article supplement (PMC3126401)
Supplement: supp_77_9_3147__6.pdf [file supp_77_9_3147__6.pdf]

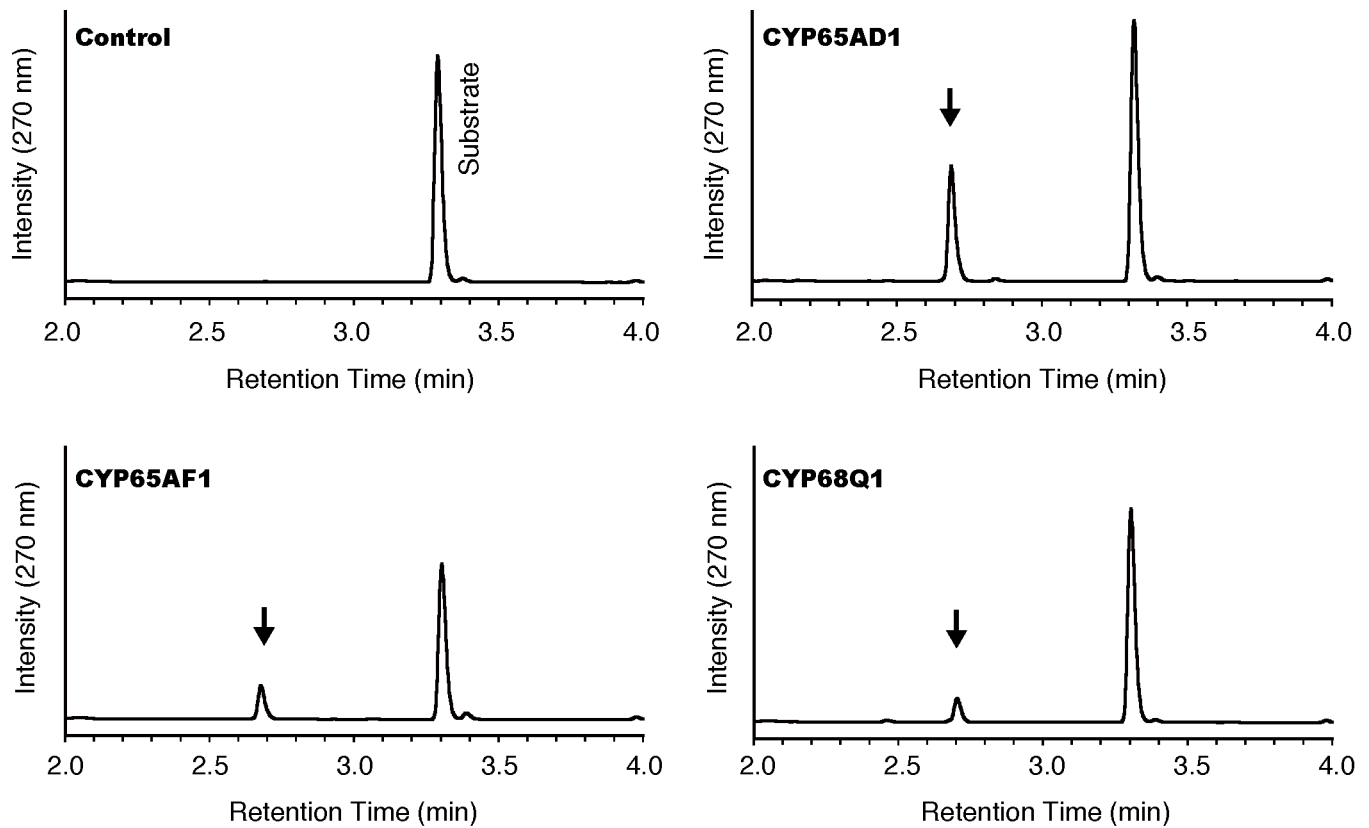

**Figure S5 HPLC analysis of diclofenac conversion**

Chromatographic conditions were the same as those for genistein.

The mobile phase gradient was as follows: 0–0.2 min, 10% B; 0.2–3.2 min, 10–50% B; 3.2–3.6 min, 50–100% B; 3.6–4.0 min, 100% B. The flow rate was 1.4 mL/min. Arrows indicate a product.
