# Supplementary material
Source: PubMed Central journal article supplement (PMC3126401)

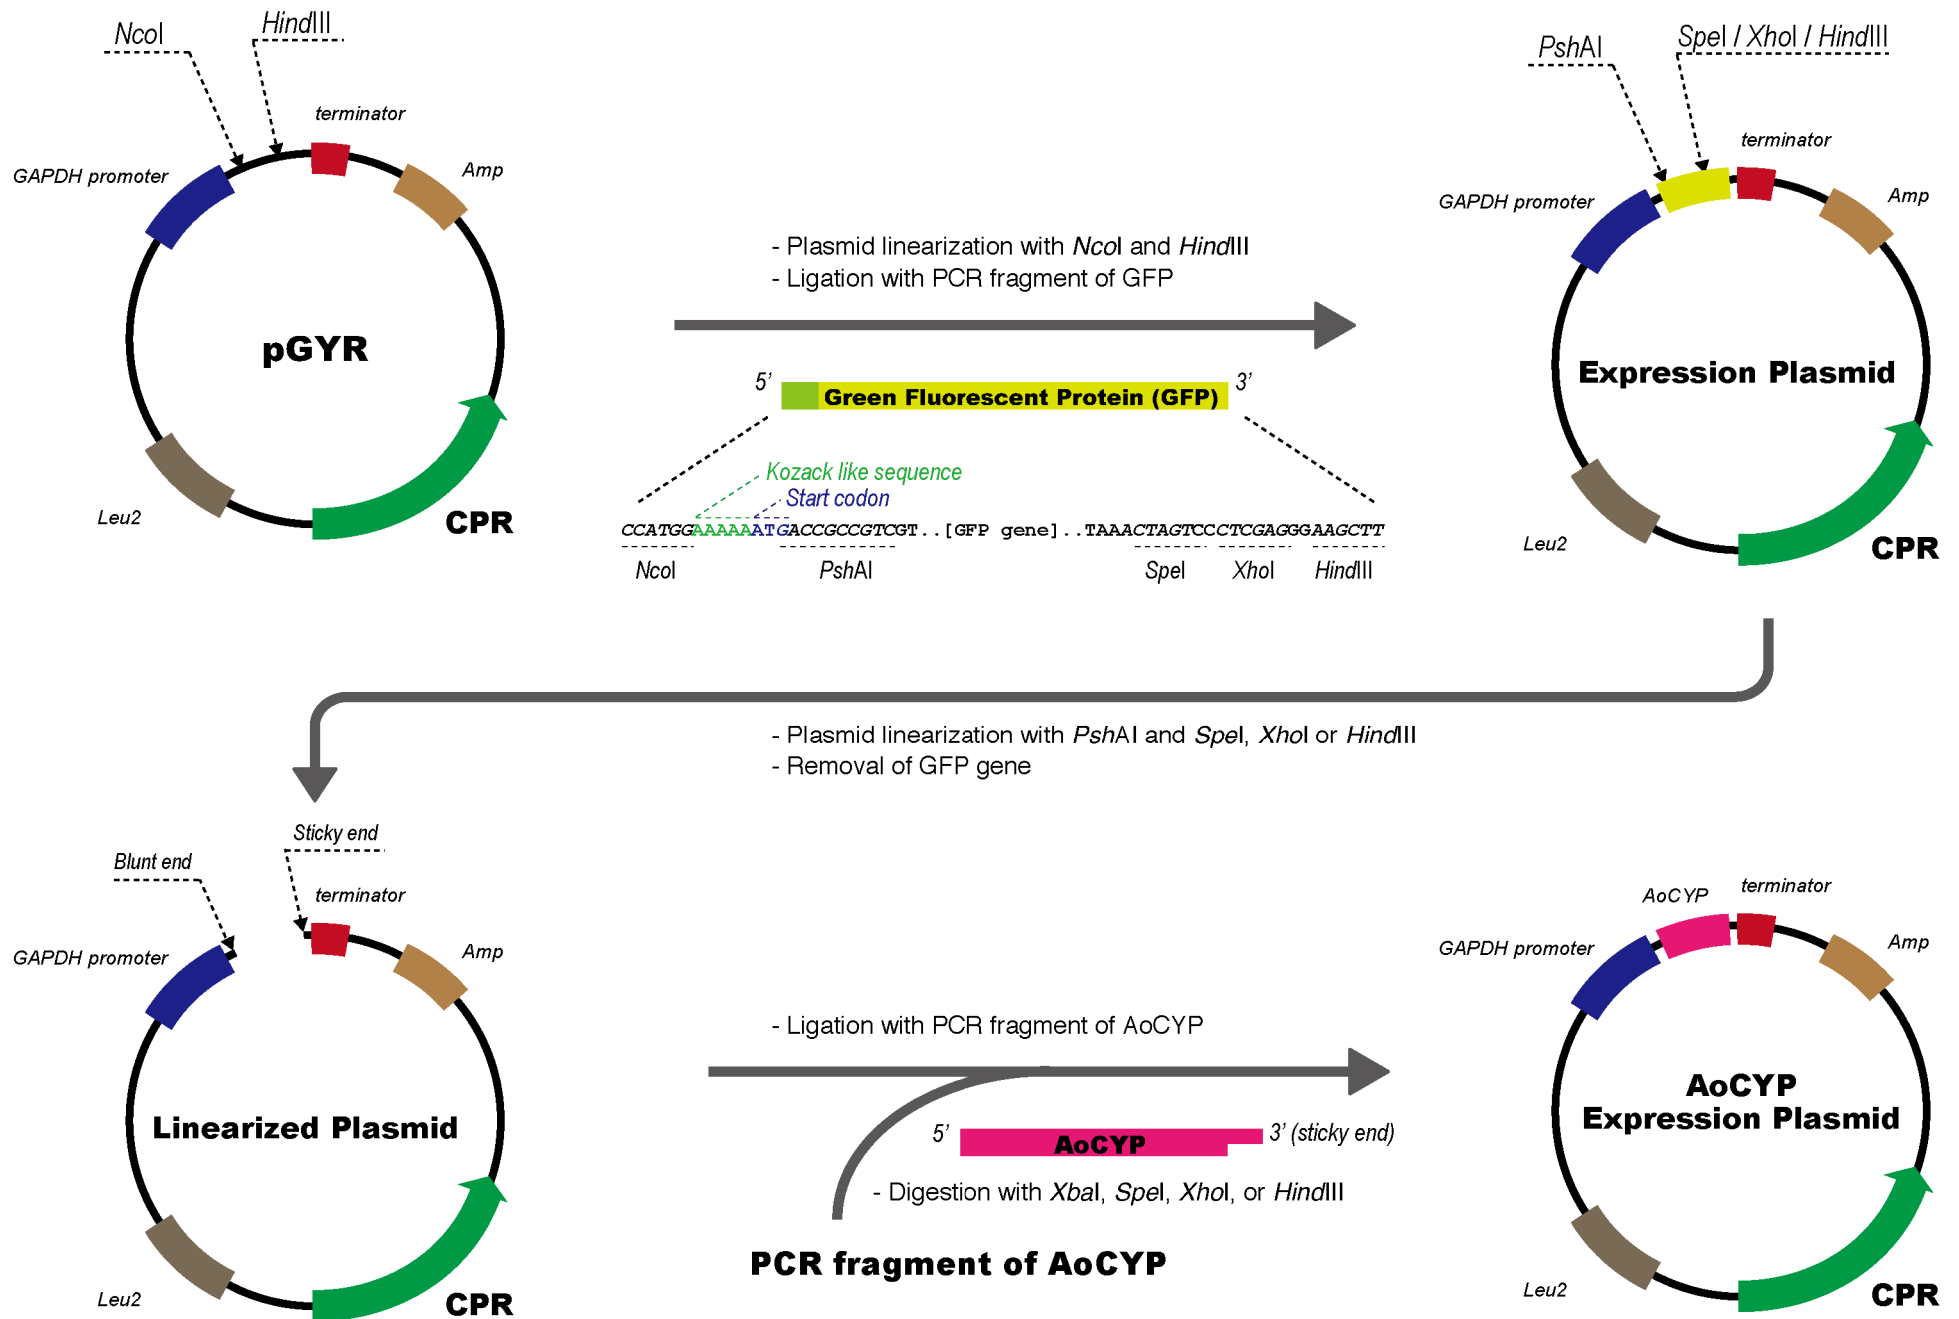

Figure S1 Construction of expression plasmid

Supplement: supp_77_9_3147__2.pdf [file supp_77_9_3147__2.pdf]
